# Supplementary material for: A pilot, open labelled, randomised controlled trial of hypertonic saline nasal irrigation and gargling for the common cold
Source: PubMed Central journal article supplement (PMC6355924; doi:10.1038/s41598-018-37703-3), 2019-01-31
Supplement: 41598_2018_37703_MOESM1_ESM.pdf [file 41598_2018_37703_MOESM1_ESM.pdf]

## Supplementary material:

**Title:**

**A pilot, open labelled, randomised controlled trial of hypertonic saline nasal irrigation and gargling for the common cold.**

**Authors:**

Sandeep Ramalingam<sup>1\*</sup>, Catriona Graham<sup>2</sup>, Jenny Dove<sup>1</sup>, Lynn Morrice<sup>3</sup>, Aziz Sheikh<sup>3</sup>.

<sup>1</sup> Department of Laboratory Medicine, Royal Infirmary of Edinburgh, 51 Little France Crescent, Edinburgh EH16 4SA.

<sup>2</sup> Wellcome Trust Clinical Research Facility, University of Edinburgh, Western General Hospital, Crewe Road South, Edinburgh, EH4 2XU

<sup>3</sup> Centre of Medical Informatics, Usher Institute of Population Health Sciences and Informatics, The University of Edinburgh, Medical School Doorway 3, Teviot Place, Edinburgh, EH8 9AG

**\*Corresponding author:**

Dr. Sandeep Ramalingam,

Consultant Virologist, Department of Laboratory Medicine, Royal Infirmary of Edinburgh, 51 Little France Crescent, Edinburgh EH16 4SA.

Email: [sandeep.ramalingam@nhslothian.scot.nhs.uk](mailto:sandeep.ramalingam@nhslothian.scot.nhs.uk)

## Supplementary Methods:

19

### 20 INSTRUCTIONS ON THE PREPARATION OF HYPERTONIC SALINE: (FOR VIDEO: WWW.ELVISSTUDY.COM)

21

#### Edinburgh & Lothians Viral Intervention Study

##### Preparation of hypertonic saline:

You are provided two graduated bowls (120ml/250ml) and a flask. You can prepare the solution either in the bowl or in the flask. The instructions are given below.

###### To make 100ml of 3% solution in the bowl:

- Add 3g of sea salt with digital measuring spoon into a clean bowl.
- Add boiled cooled water to 100 ml mark of bowl (warmth – to suit you). If you add freshly boiled water instead, wait for it to cool before using.
- Mix to ensure salt dissolves.
- Taste the solution. It should taste salty and NOT too salty or sting your mouth
  - If it is too salty or stings your mouth, it will sting your nose.
  - If it is too salty, use the highest concentration you are comfortable with.
  - See table below for lower concentrations.
  - Document which concentration you decide to use.
- The table below gives the amount of salt that needs to be added to make solutions of different strength or volumes.

###### To make larger volumes of hypertonic solution for use during the day:

- To make a 3% solution, add 15g of sea-salt into 500 ml flask provided.
- Fill the flask to the top with boiling water. Close, shake to mix and then store.
- Prior to performing HSNIG, pour out required quantity into clean bowl.
- Wait for it to cool and perform HSNIG.
- Use a clean flask to prepare solution. Make a fresh batch at least every 24 hours.
- Refer to table below to prepare different concentrations. Please document which concentration you decide to use.

###### **Table:**

###### Amount of Salt in grams to be added to make different volumes of solution:

| Add g of salt to make solution | Concentration of solution |       |      |      |
|--------------------------------|---------------------------|-------|------|------|
|                                | 3.0%                      | 2.5%  | 2.0% | 1.5% |
| 100ml – Bowl                   | 3g                        | 2.5g  | 2g   | 1.5g |
| 200ml – Bowl                   | 6g                        | 5g    | 4g   | 3g   |
| 500ml – Flask                  | 15g                       | 12.5g | 10g  | 7.5g |

###### How to use the digital measuring spoon:

- To switch on:** Press the “On/Off/Tare” button.
- Check if it is measuring in **grams**. (If it says Oz, press “Mode” to change to g).
- Tare:** Press the “On/Off/Tare” button to bring reading to 0.0g
- Scoop required amount of salt gently.
- If you need more, scoop required quantity
- If in excess, gently remove excess.
- Measure out salt into bowl / flask as appropriate.
- To switch off:** Press and hold “On/Off/Tare” button.

###### **Caution:**

- Avoid rough handling of the scale. Avoid shaking / dropping scale.
- Do not use the digital measuring spoon to mix the solution.

#### Edinburgh & Lothians Viral Intervention Study

##### How to perform hypertonic saline nasal irrigation and gargling (HSNIG):

- Use a **clean** bowl to perform HSNIG.
- Either prepare the solution in a clean bowl or transfer from flask into a clean bowl.
- Wait for solution to cool.
- Bend over the sink, close right nostril.
- Bring bowl to the left nostril such that the solution is in contact with the left nostril.
- Inhale **slowly and steadily** through the nose. The solution will enter the nose, and go to the back of the throat. Do not swallow the solution.
- Some solution will come out via the nose and some via the mouth (keep mouth open).
- Repeat this procedure three times for each nostril.
- If the solution that drains is not clear, repeat the procedure for each nostril until it is clear.
- Then gargle three times with the remainder of the solution.
- Clean the bowl with soap and water and store.
- Blow each nostril gently into a tissue (First with head held straight and next bent over sink with chin close to chest to make excess fluid come out. Keeping your chin close to chest will assist any liquid which may have entered the sinuses drain).
- For the next 10-15 minutes, you may feel the need to blow your nose a few times.
- After the procedure, your symptoms should decrease. However, symptoms may re-appear (within 1-2 hours in the first few days and within 4-5 hours after a few days of irrigation). Irrigate as soon as you feel symptoms returning.
- Hence for the first two – three days, you may have to do the procedure for around 6 times a day. This should decrease in subsequent days.
- If you wake up in the middle of the night with symptoms, try to perform the procedure as it may help you sleep better.

## COLLECTING NASAL SWABS AND RETURN OF SPECIMEN:

## Edinburgh &amp; Lothians Viral Intervention Study

**Collecting nasal swabs and return of specimen:****On day 0: In the presence of the trial nurse.**

- Remove the swab from the packaging
- Insert the swab into a nostril (left or right) up to the swab's collar.
- Rotate three times.
- Insert the swab into the transport medium **marked day 0**
- Snap the top part of the swab (it will break in the middle where you can see a line).
- Replace the cap and close the transport medium tight.
- Hand over the swab to the trial nurse.

**On days 1-4: At home.**

- The nasal swab has to be collected first thing in the morning.
- Please collect the swab before performing nasal irrigation + gargling if you are in the intervention arm
- Follow instructions to collect swab as given above
- On day 1, insert the swab into the transport medium marked day 1
  - On day 2, insert the swab into the transport medium marked day 2
  - On day 3, insert the swab into the transport medium marked day 3
  - On day 4, insert the swab into the transport medium marked day 4
- Snap the top part of the swab (it will break in the middle where you can see a line).
- Replace the cap and close the transport medium tight.
- Place the sample within a pocket in the absorbent material. Place it in the plastic self-seal bag.
- Store the sample in a safe place at room temperature.
- On day 4, place all samples in the self-seal plastic bag along with the absorbent material and seal the bag.
- Place the self-seal bag in clear plastic container in the Royal Mail Safebox™ (Step 3– Instructions on using the Royal Mail Safebox)
- Remove the card board separator from the lid and dispose of it (Step 5– Instructions on using the Royal Mail Safebox)
- Press the lid over the top of the container and firmly press shut (Step 6– Instructions on using the Royal Mail Safebox)
- Peel the outer backing from the self-adhesive label. Then wrap around the Royal Mail Safebox™ (Step 7/8- Instructions on using the Royal Mail Safebox)
- Drop of the Royal Mail Safebox™ in any post-box (Step 9– Instructions on using the Royal Mail Safebox).

25

### **Supplementary Results:**

26 **Pattern of completion of daily forms:** Most participants completed the “WURSS-21-Scot”  
27 daily until they were well (i.e. a score of 0) on two days. Five individuals completed the daily  
28 forms for fourteen days but did not score 0 on two consecutive days. Eleven participants  
29 stopped before scoring 0 on 2 consecutive days. Of these, eight scored 0 on the last day of  
30 completion, two scored 1 on two consecutive days and the last person stopped on day 6 with  
31 a score of 5.

32 **WURSS-21 and EQ-VAS Scores:** From the “WURSS-21-Scot” diaries, the average WURSS-21  
33 score could be calculated for each participant over 14 days. Of the 549 “WURSS-21-Scot”  
34 diaries, a daily score was not available for 34 records [7=no information, 9 = 0 recorded for  
35 ‘how unwell today’ and no further questions answered, 18 where questions in the WURSS-  
36 21-Scot were missed]. The median (IQR) average WURSS 21 score in the intervention arm was  
37 13.2 (7.6, 16.4) [n=30] and 16.9 (9.9, 24.7) [n=31] in the control arm (p=0.09). The median  
38 average scores and ranges for individual symptoms over 14 days are given in Table S3. Head  
39 congestion (p=0.04) and sneezing (p=0.03) were significantly lower in the intervention arm.  
40 The mean (SD) average quality of life measure (EQ-VAS) over the study duration was higher  
41 at 74.3 (12.1) [n=30] for the intervention arm and 70.8 (15.5) [n=31] in the control arm. The  
42 difference in means of 3.4, 95% CI for difference (-3.7, 10.6) was not significant (p=0.338). As  
43 EQ-VAS, is an indicator of how a person feels on a given day, is not specific to URTI, it is  
44 probably not suitable for studies on URTI.

45 **Change in viral shedding a symptom severity on days after HSNIG was stopped (Intervention**  
46 **arm):** Thirteen individuals stopped nasal irrigation before day four followed by an increase in  
47 viral shedding is seen in seven (participants 13-19), and stabilisation of symptoms in eight

48 (participant numbers 13-18, 27, 29). Four individuals restarted HSNIG for one or more days  
49 (participant numbers 5, 17, 27, 29) while in four, symptoms stabilised for 2-3 days before  
50 becoming asymptomatic (participant numbers 13-16).

51 ***Difference in viral shedding between arms:*** To determine if there was a difference in viral  
52 shedding between arms, we deducted the baseline value from the end-point sample. A  
53 negative value means a reduction in viral shedding and a positive value means an increase in  
54 viral shedding. The median (IQR) reduction in viral shedding in the intervention arm was -2.23  
55  $\log_{10}$  (-3.04, -0.32) [n=26] and -1.51  $\log_{10}$  (-3.30, -0.55) [n=21] in the control arm. The  
56 reduction in viral shedding between arms was however not statistically significant (p=0.9).

57 ***Difference in reduction in viral shedding/day between arms:*** Next the proportion of  
58 individual with reduction in viral shedding by  $\geq 0.5 \log_{10}/\text{day}$  was calculated. When all samples  
59 were included for this calculation, there was no difference between the two arms in the  
60 proportion of individuals who had a fall  $\geq 0.5 \log_{10}/\text{day}$  [Intervention arm 65% [n=17/26],  
61 Control arm 43% [n=9/21], difference -23%, 95% CI for difference in proportion (-50, -5)  
62 p=0.114]. However, four individuals in the intervention arm had paramyxovirus infection  
63 (Figure 4; 3=HMPV; 10&21=PIV-3; 25=RSV), but there were no paramyxovirus infections in  
64 the control arm. Since this could potentially affect the results (as paramyxoviruses tend to  
65 have a longer life cycle <sup>17,18</sup>, incubation period <sup>19</sup>, duration of viral shedding <sup>20</sup> and illness <sup>20,21</sup>  
66 compared to rhinovirus <sup>22-25</sup>), we reanalysed the data having removed individuals infected  
67 with paramyxoviruses. Now, a higher proportion of the intervention arm had a fall  $\geq 0.5$   
68  $\log_{10}/\text{day}$  compared to controls [intervention arm 73% [n=16/22], control arm 43% [n=9/21],  
69 difference -30%, 95% CI for difference in proportion (-58, -2) p=0.04].

70

**Supplementary tables and figures:**71 **Table S1: Viruses identified in the day 0 samples.**

|                             | Intervention<br>(n=32) |    | Control<br>(n=34) |    |
|-----------------------------|------------------------|----|-------------------|----|
|                             | n                      | %  | n                 | %  |
| Rhinovirus                  | 14                     | 44 | 13                | 38 |
| All Coronaviruses (COV)     | 7                      | 22 | 8                 | 24 |
| COV-229E                    | 3                      | 9  | 0                 | 0  |
| COV-OC43                    | 0                      | 0  | 1                 | 3  |
| COV-HKU1                    | 3                      | 9  | 5*                | 15 |
| COV-NL63                    | 1                      | 3  | 2                 | 6  |
| Enterovirus                 | 2*                     | 6  | 1**               | 3  |
| Influenza A virus           | 1                      | 3  | 1                 | 3  |
| Respiratory syncytial virus | 1                      | 3  | 1**               | 3  |
| Parainfluenza virus type 3  | 2                      | 6  | 0                 | 0  |
| Human metapneumovirus       | 1                      | 3  | 0                 | 0  |
| Negative                    | 5                      | 16 | 12                | 35 |

72 The panel included influenza A, B, respiratory syncytial virus, parainfluenza viruses 1-3, rhinovirus,  
73 enterovirus, parechovirus, COV 229E, COV OC43, COV NL64 and COV HKU1, human metapneumovirus,  
74 adenovirus, bocavirus and mycoplasma

75 \*- 1 dual infection with rhinovirus.

76 \*\* - No daily forms or follow up samples received.

77

78 **Table S2: Days for individual symptoms to get better and functional questions to**

79 **normalise:**

| Well / Symptoms      | Mean days           |                | Mean Difference | 95% CI Mean |     | P value          |
|----------------------|---------------------|----------------|-----------------|-------------|-----|------------------|
|                      | Intervention (n=30) | Control (n=31) |                 |             |     |                  |
| Days to feeling well | 6.8                 | 8.7            | 1.9             | 0.4         | 3.3 | <b>0.01</b>      |
| Runny nose           | 6.7                 | 8.5            | 1.8             | 0.4         | 3.2 | <b>0.01</b>      |
| Blocked nose         | 6.0                 | 8.7            | 2.7             | 1.2         | 4.1 | <b>&lt;0.001</b> |
| Sneezing             | 5.7                 | 7.3            | 1.5             | 0.3         | 2.9 | <b>0.02</b>      |
| Sore throat          | 5.1                 | 6.4            | 1.3             | -0.2        | 2.8 | 0.09             |
| Scratchy throat      | 5.1                 | 6.3            | 1.2             | -0.2        | 2.5 | 0.09             |
| Cough                | 4.9                 | 7.4            | 2.4             | 0.9         | 4.0 | <b>0.003</b>     |
| Hoarseness           | 4.8                 | 6.5            | 1.7             | 0.2         | 3.1 | <b>0.02</b>      |
| Head congestion      | 6.4                 | 7.3            | 0.9             | -0.6        | 2.4 | 0.26             |
| Chest congestion     | 4.4                 | 5.2            | 0.8             | -0.6        | 2.3 | 0.25             |
| Feeling tired        | 6.5                 | 7.9            | 1.4             | 0.0         | 2.8 | 0.06             |

80

81 **Table S3: Difference in severity of symptoms between arms:**

|                      | Intervention (n=30) |           | Control (n=31) |           | p value        |
|----------------------|---------------------|-----------|----------------|-----------|----------------|
|                      | Median              | IQR       | Median         | IQR       |                |
| Total WURSS-21 score | 13.2                | 7.6, 16.4 | 16.9           | 9.9, 24.7 | 0.09           |
| Runny nose           | 1.0                 | 0.6, 1.5  | 1.4            | 0.8, 2.1  | 0.21           |
| Blocked nose         | 0.9                 | 0.4, 1.4  | 1.4            | 0.7, 2.2  | 0.09           |
| Sneezing             | 0.6                 | 0.4, 0.9  | 0.9            | 0.6, 1.5  | <b>0.03</b>    |
| Sore throat          | 0.5                 | 0.1, 0.9  | 0.6            | 0.3, 1.4  | 0.34           |
| Scratchy throat      | 0.5                 | 0.3, 0.6  | 0.5            | 0.1, 1.4  | 0.94           |
| Cough                | 0.5                 | 0.1, 1.1  | 0.9            | 0.2, 1.9  | 0.10           |
| Hoarseness           | 0.3                 | 0.1, 0.8  | 0.7            | 0.3, 1.1  | 0.25           |
| Head congestion      | 0.7                 | 0.4, 1.1  | 1.2            | 0.7, 1.8  | <b>0.04</b>    |
| Chest congestion     | 0.2                 | 0.0, 0.4  | 0.3            | 0.0, 1.1  | 0.33           |
| Feeling Tired        | 1.0                 | 0.4, 1.4  | 1.3            | 0.5, 2.1  | 0.14           |
|                      |                     |           |                |           |                |
|                      | <b>Mean</b>         | <b>SD</b> | <b>Mean</b>    | <b>SD</b> | <b>p value</b> |
| EQ-VAS               | 74.3                | 12.1      | 70.8           | 15.5      | 0.338          |

82



83 **Table S4: Feedback about HSNIG – Intervention arm:**

|                                             | n=28 | %   |
|---------------------------------------------|------|-----|
| Ease of preparing solution: Easy            | 28   | 100 |
| Made solution in bulk (Flask)               | 24   | 86  |
| Preferred small bowl for HSNIG              | 21   | 75  |
| HSNIG was: Comfortable                      | 11   | 39  |
| Moderately comfortable                      | 14   | 50  |
| Uncomfortable                               | 3    | 11  |
| Performed HSNIG outside home                | 24   | 86  |
| If so was it easy to do? Easy               | 8    | 29  |
| Moderate                                    | 11   | 39  |
| Difficult                                   | 5    | 18  |
| Equipment cleaning: Easy                    | 27   | 96  |
| HSNIG on the whole: Convenient              | 11   | 39  |
| Moderate                                    | 14   | 50  |
| Inconvenient                                | 3    | 11  |
| Do you feel HSNIG made a difference? Yes    | 26   | 93  |
| Would you use HSNIG in the future: Likely   | 17   | 61  |
| Undecided                                   | 7    | 25  |
| Unlikely                                    | 4    | 14  |
| If HSNIG was more convenient: Likely        | 24   | 86  |
| Undecided                                   | 2    | 7   |
| Unlikely                                    | 2    | 7   |
| Would you use HSNIG for prophylaxis: Likely | 6    | 21  |
| Undecided                                   | 2    | 7   |
| Unlikely                                    | 20   | 71  |

84

Figure S1: Daily Form “WURSS-21-Scot”

**Edinburgh and Lothians Viral Intervention Study**  
 Subject Number: \_\_\_\_\_ Date: \_\_\_\_\_ Time: \_\_\_\_\_  
**Daily Form – Day 1**

|                                  | Not unwell<br>0       | Very Mildly<br>1      | Mildly<br>2           | Moderately<br>3       | Moderately<br>4       | Moderately<br>5       | Severely<br>6         | Severely<br>7         |
|----------------------------------|-----------------------|-----------------------|-----------------------|-----------------------|-----------------------|-----------------------|-----------------------|-----------------------|
| 1. How unwell do you feel today? | <input type="radio"/> | <input type="radio"/> | <input type="radio"/> | <input type="radio"/> | <input type="radio"/> | <input type="radio"/> | <input type="radio"/> | <input type="radio"/> |

Once you have answered ‘not unwell’ for 2 consecutive days or for a maximum of 14 days you do not need to complete any further information on the daily form. Please go directly to the ‘End of study form’.

2. Please rate the average severity of your cold symptoms over the last 24 hours for each symptom

|                        | Do not have this<br>0 | Very Mildly<br>1      | Mildly<br>2           | Mildly<br>3           | Moderately<br>4       | Moderately<br>5       | Severely<br>6         | Severely<br>7         |
|------------------------|-----------------------|-----------------------|-----------------------|-----------------------|-----------------------|-----------------------|-----------------------|-----------------------|
| Runny nose             | <input type="radio"/> | <input type="radio"/> | <input type="radio"/> | <input type="radio"/> | <input type="radio"/> | <input type="radio"/> | <input type="radio"/> | <input type="radio"/> |
| Blocked (plugged) nose | <input type="radio"/> | <input type="radio"/> | <input type="radio"/> | <input type="radio"/> | <input type="radio"/> | <input type="radio"/> | <input type="radio"/> | <input type="radio"/> |
| Sneezing               | <input type="radio"/> | <input type="radio"/> | <input type="radio"/> | <input type="radio"/> | <input type="radio"/> | <input type="radio"/> | <input type="radio"/> | <input type="radio"/> |
| Sore throat            | <input type="radio"/> | <input type="radio"/> | <input type="radio"/> | <input type="radio"/> | <input type="radio"/> | <input type="radio"/> | <input type="radio"/> | <input type="radio"/> |
| Scratchy throat        | <input type="radio"/> | <input type="radio"/> | <input type="radio"/> | <input type="radio"/> | <input type="radio"/> | <input type="radio"/> | <input type="radio"/> | <input type="radio"/> |
| Cough                  | <input type="radio"/> | <input type="radio"/> | <input type="radio"/> | <input type="radio"/> | <input type="radio"/> | <input type="radio"/> | <input type="radio"/> | <input type="radio"/> |
| Hoarseness             | <input type="radio"/> | <input type="radio"/> | <input type="radio"/> | <input type="radio"/> | <input type="radio"/> | <input type="radio"/> | <input type="radio"/> | <input type="radio"/> |
| Head congestion        | <input type="radio"/> | <input type="radio"/> | <input type="radio"/> | <input type="radio"/> | <input type="radio"/> | <input type="radio"/> | <input type="radio"/> | <input type="radio"/> |
| Chest congestion       | <input type="radio"/> | <input type="radio"/> | <input type="radio"/> | <input type="radio"/> | <input type="radio"/> | <input type="radio"/> | <input type="radio"/> | <input type="radio"/> |
| Feeling tired          | <input type="radio"/> | <input type="radio"/> | <input type="radio"/> | <input type="radio"/> | <input type="radio"/> | <input type="radio"/> | <input type="radio"/> | <input type="radio"/> |

3. Over the last 24 hours, how much has your cold interfered with your ability to:

|                              | Not at all<br>0       | Very Mildly<br>1      | Mildly<br>2           | Mildly<br>3           | Moderately<br>4       | Moderately<br>5       | Severely<br>6         | Severely<br>7         |
|------------------------------|-----------------------|-----------------------|-----------------------|-----------------------|-----------------------|-----------------------|-----------------------|-----------------------|
| Think clearly                | <input type="radio"/> | <input type="radio"/> | <input type="radio"/> | <input type="radio"/> | <input type="radio"/> | <input type="radio"/> | <input type="radio"/> | <input type="radio"/> |
| Sleep well                   | <input type="radio"/> | <input type="radio"/> | <input type="radio"/> | <input type="radio"/> | <input type="radio"/> | <input type="radio"/> | <input type="radio"/> | <input type="radio"/> |
| Breathe easily               | <input type="radio"/> | <input type="radio"/> | <input type="radio"/> | <input type="radio"/> | <input type="radio"/> | <input type="radio"/> | <input type="radio"/> | <input type="radio"/> |
| Walk, climb stairs, exercise | <input type="radio"/> | <input type="radio"/> | <input type="radio"/> | <input type="radio"/> | <input type="radio"/> | <input type="radio"/> | <input type="radio"/> | <input type="radio"/> |
| Accomplish daily activities  | <input type="radio"/> | <input type="radio"/> | <input type="radio"/> | <input type="radio"/> | <input type="radio"/> | <input type="radio"/> | <input type="radio"/> | <input type="radio"/> |
| Work outside the home        | <input type="radio"/> | <input type="radio"/> | <input type="radio"/> | <input type="radio"/> | <input type="radio"/> | <input type="radio"/> | <input type="radio"/> | <input type="radio"/> |
| Work inside the home         | <input type="radio"/> | <input type="radio"/> | <input type="radio"/> | <input type="radio"/> | <input type="radio"/> | <input type="radio"/> | <input type="radio"/> | <input type="radio"/> |
| Interact with others         | <input type="radio"/> | <input type="radio"/> | <input type="radio"/> | <input type="radio"/> | <input type="radio"/> | <input type="radio"/> | <input type="radio"/> | <input type="radio"/> |
| Live your personal life      | <input type="radio"/> | <input type="radio"/> | <input type="radio"/> | <input type="radio"/> | <input type="radio"/> | <input type="radio"/> | <input type="radio"/> | <input type="radio"/> |

4. Compared to yesterday, I feel that my cold is:

| Very much better      | Somewhat better       | A little better       | The same              | A little worse        | Somewhat worse        | Very much worse       |
|-----------------------|-----------------------|-----------------------|-----------------------|-----------------------|-----------------------|-----------------------|
| <input type="radio"/> | <input type="radio"/> | <input type="radio"/> | <input type="radio"/> | <input type="radio"/> | <input type="radio"/> | <input type="radio"/> |

**Edinburgh and Lothians Viral Intervention Study**  
 Subject Number: \_\_\_\_\_ Date: \_\_\_\_\_ Time: \_\_\_\_\_  
**Daily Form – Day 1**

**Procedure – All:**  
 5.a. Please note you are allowed to either blow or not blow your nose before nasal swab is collected. We just need to know the procedure you followed.  
 Did you collect nasal swab? Yes  No   
 If Yes: Did you blow your nose prior to collecting nasal swab? Yes  No

**Procedure – Intervention arm only, controls please go to Q9.**  
 5.b. If you performed the nasal irrigation procedure yesterday did you use the same concentration of solution? Yes  No  Did not perform yesterday

If yes please go to Q6, if not:  
 How much salt have you used? \_\_\_\_\_ grams  
 How much water have you used? \_\_\_\_\_ ml

6. How many times have you performed the procedure in the last 24 hours?  
 0  1  2  3  4  5  6  7  8  9  10  11  12

7. What techniques did you use? Irrigation + gargle   
 Irrigation only   
 Gargle only   
 None   
 If none please indicate reason: \_\_\_\_\_

8. Did you notice any side effects? Yes  No

If yes please indicate how severe you felt these:

|            | None<br>0             | 1                     | 2                     | 3                     | 4                     | Severe<br>5           |
|------------|-----------------------|-----------------------|-----------------------|-----------------------|-----------------------|-----------------------|
| Irritation | <input type="radio"/> | <input type="radio"/> | <input type="radio"/> | <input type="radio"/> | <input type="radio"/> | <input type="radio"/> |
| Burning    | <input type="radio"/> | <input type="radio"/> | <input type="radio"/> | <input type="radio"/> | <input type="radio"/> | <input type="radio"/> |
| Pain       | <input type="radio"/> | <input type="radio"/> | <input type="radio"/> | <input type="radio"/> | <input type="radio"/> | <input type="radio"/> |
| Dryness    | <input type="radio"/> | <input type="radio"/> | <input type="radio"/> | <input type="radio"/> | <input type="radio"/> | <input type="radio"/> |
| Runny nose | <input type="radio"/> | <input type="radio"/> | <input type="radio"/> | <input type="radio"/> | <input type="radio"/> | <input type="radio"/> |
| Other      | <input type="radio"/> | <input type="radio"/> | <input type="radio"/> | <input type="radio"/> | <input type="radio"/> | <input type="radio"/> |

If other please describe: \_\_\_\_\_

9. Since you last completed these questions have you taken any cold / flu related medications? Yes  No   
 If yes, what did you take? \_\_\_\_\_

**Edinburgh and Lothians Viral Intervention Study**  
 Subject Number: \_\_\_\_\_ Date: \_\_\_\_\_ Time: \_\_\_\_\_  
**Daily Form – Day 1**

10. To help people say how good or bad a health state is, we have drawn a scale (rather like a thermometer) on which the best state you can imagine is marked 100 and the worst state you can imagine is marked 0.

We would like you to indicate on this scale how good or bad your own health is today, in your opinion. Please do this by drawing a line from the box below to whichever point on the scale indicates how good or bad your health state is today.

Your own health state today

11. Since you last completed these questions have you sought further medical attention for your cold?  
 Yes  No

If yes where did you seek help?  
 GP   
 Hospital   
 Other  please specify: \_\_\_\_\_

(If you have answered Yes to this question, please go to the “End of study form”)

## Figure S2: End-of-Study Form

### Edinburgh and Lothians Viral Intervention Study

#### End of Study Form

Subject Number: \_\_\_\_\_ Date: \_\_\_\_\_ Time: \_\_\_\_\_

#### 1. As a result of your symptoms did you:

Take any time off work/education?: Yes  No   
If yes please indicate number of days: \_\_\_\_\_ days

Take any medications? Yes  No   
If yes please provide details: \_\_\_\_\_

Visit your GP Yes  No   
Attend hospital Yes  No

#### 2. Did anyone else in your house experience similar symptoms after you?

If yes, how many adults experienced symptoms Yes  No   
How many children experienced symptoms \_\_\_\_\_

3. Did you perform gargling/nasal irrigation: Yes  No   
If no please go to question 6, if yes please complete the following:

If you were allocated to the **control arm**, i.e. not allocated to perform nasal irrigation / gargling, what method did you use and how did you find out about this method?  
\_\_\_\_\_

If you were allocated to the **intervention arm**,  
Which container did you usually make up the solution in?  
Small bowl  Large bowl  Flask

Which bowl did you usually use to perform gargling/irrigation?  
Small bowl  Large bowl

Please select the box that best describes the following statements:

|                                                                          | Did not perform          | Very easy                | Easy                     | Moderate                 | Difficult                | Very difficult           |
|--------------------------------------------------------------------------|--------------------------|--------------------------|--------------------------|--------------------------|--------------------------|--------------------------|
| How comfortable was the procedure?                                       |                          | <input type="checkbox"/> | <input type="checkbox"/> | <input type="checkbox"/> | <input type="checkbox"/> | <input type="checkbox"/> |
| How easy was it to make the solution?                                    |                          | <input type="checkbox"/> | <input type="checkbox"/> | <input type="checkbox"/> | <input type="checkbox"/> | <input type="checkbox"/> |
| How easy was it to perform outside your home?                            | <input type="checkbox"/> | <input type="checkbox"/> | <input type="checkbox"/> | <input type="checkbox"/> | <input type="checkbox"/> | <input type="checkbox"/> |
| How easy was it to clean everything required for the procedure?          | <input type="checkbox"/> | <input type="checkbox"/> | <input type="checkbox"/> | <input type="checkbox"/> | <input type="checkbox"/> | <input type="checkbox"/> |
| How easy was it to carry with you everything required for the procedure? | <input type="checkbox"/> | <input type="checkbox"/> | <input type="checkbox"/> | <input type="checkbox"/> | <input type="checkbox"/> | <input type="checkbox"/> |
| How convenient did you find the procedure as a whole?                    | <input type="checkbox"/> | <input type="checkbox"/> | <input type="checkbox"/> | <input type="checkbox"/> | <input type="checkbox"/> | <input type="checkbox"/> |

### Edinburgh and Lothians Viral Intervention Study

#### 4. Do you feel the procedure has made a difference to your symptoms?

Yes  No

If yes, what difference do you feel it has made: \_\_\_\_\_

#### 5. Future use of gargling/nasal irrigation:

Please select the box that best describes the following statements:

|                                                                                                                | Very likely              | Likely                   | Undecided                | Unlikely                 | Very unlikely            |
|----------------------------------------------------------------------------------------------------------------|--------------------------|--------------------------|--------------------------|--------------------------|--------------------------|
| If you have the symptoms of the cold in the future, how likely would you be to use this procedure?             | <input type="checkbox"/> | <input type="checkbox"/> | <input type="checkbox"/> | <input type="checkbox"/> | <input type="checkbox"/> |
| If the procedure was more convenient to perform, how likely would you be to use this procedure?                | <input type="checkbox"/> | <input type="checkbox"/> | <input type="checkbox"/> | <input type="checkbox"/> | <input type="checkbox"/> |
| Would you consider performing the gargling/irrigation procedure once or twice a day as a preventative measure? | <input type="checkbox"/> | <input type="checkbox"/> | <input type="checkbox"/> | <input type="checkbox"/> | <input type="checkbox"/> |

#### 6. Study procedures and documentation:

Please select the box that best describes the following statements:

|                                                          | Did not perform          | Very easy                | Easy                     | Moderate                 | Difficult                | Very difficult           |
|----------------------------------------------------------|--------------------------|--------------------------|--------------------------|--------------------------|--------------------------|--------------------------|
| How easy was it for you to collect the swabs?            | <input type="checkbox"/> | <input type="checkbox"/> | <input type="checkbox"/> | <input type="checkbox"/> | <input type="checkbox"/> | <input type="checkbox"/> |
| How easy was it to return the swabs?                     | <input type="checkbox"/> | <input type="checkbox"/> | <input type="checkbox"/> | <input type="checkbox"/> | <input type="checkbox"/> | <input type="checkbox"/> |
| How easy was it to complete the daily diary information? | <input type="checkbox"/> | <input type="checkbox"/> | <input type="checkbox"/> | <input type="checkbox"/> | <input type="checkbox"/> | <input type="checkbox"/> |
| How easy was it to complete the other forms?             | <input type="checkbox"/> | <input type="checkbox"/> | <input type="checkbox"/> | <input type="checkbox"/> | <input type="checkbox"/> | <input type="checkbox"/> |

  

|                                                                                                                 | Not viewed               | Very helpful             | Helpful                  | Undecided                | Unhelpful                | Very unhelpful           |
|-----------------------------------------------------------------------------------------------------------------|--------------------------|--------------------------|--------------------------|--------------------------|--------------------------|--------------------------|
| How helpful did you find the information provided before joining the study?                                     |                          | <input type="checkbox"/> | <input type="checkbox"/> | <input type="checkbox"/> | <input type="checkbox"/> | <input type="checkbox"/> |
| How helpful did you find the instructions and information provided in your study pack?                          |                          | <input type="checkbox"/> | <input type="checkbox"/> | <input type="checkbox"/> | <input type="checkbox"/> | <input type="checkbox"/> |
| <b>Intervention group only:</b><br>How helpful did you find the instructional video for the irrigation methods? | <input type="checkbox"/> | <input type="checkbox"/> | <input type="checkbox"/> | <input type="checkbox"/> | <input type="checkbox"/> | <input type="checkbox"/> |
